# Supplementary material for: Fire retardance by surface nanostructuration
Source: MDPI journal article supplement (doi:10.3390/medicina60010160), 2012-01-01
Supplement: s1 [file s1]

**Table S1.** Statistical analysis of education level and quality of life by *t*-test (N = 44).

| Aspect                      | Education Level      | N  | Average | Standard Deviation | <i>t</i> -Value | <i>p</i> -Value |
|-----------------------------|----------------------|----|---------|--------------------|-----------------|-----------------|
| Quality of Live             | High school or below | 22 | 20.55   | 5.65               | 4.040 ***       | 0.000           |
|                             | College or above     | 22 | 12.45   | 7.50               |                 |                 |
| Disease Symptoms            | High school or below | 22 | 5.00    | 0.98               | 3.984 ***       | 0.000           |
|                             | College or above     | 22 | 3.50    | 1.47               |                 |                 |
| Daily Activities            | High school or below | 22 | 4.32    | 1.49               | 4.045 ***       | 0.000           |
|                             | College or above     | 22 | 2.36    | 1.71               |                 |                 |
| Leisure Activities          | High school or below | 22 | 3.82    | 1.59               | 3.258 **        | 0.002           |
|                             | College or above     | 22 | 2.18    | 1.74               |                 |                 |
| Work and Study              | High school or below | 22 | 1.77    | 1.23               | 1.276           | 0.209           |
|                             | College or above     | 22 | 1.32    | 1.13               |                 |                 |
| Interpersonal Relationships | High school or below | 22 | 3.09    | 1.72               | 3.055 **        | 0.004           |
|                             | College or above     | 22 | 1.50    | 1.74               |                 |                 |
| Treatment                   | High school or below | 22 | 2.55    | 0.80               | 3.584 **        | 0.001           |
|                             | College or above     | 22 | 1.59    | 0.96               |                 |                 |

Note: \*\*  $p < 0.01$ ; \*\*\*  $p < 0.001$ .

**Table S2.** Statistical analysis of chronic diseases and quality of life by *t*-test (N = 44).

| Aspect                      | Chronic Diseases | N  | Average | Standard Deviation | <i>t</i> -Value | <i>p</i> -Value |
|-----------------------------|------------------|----|---------|--------------------|-----------------|-----------------|
| Quality of Live             | No               | 19 | 15.37   | 7.14               | -0.843          | 0.404           |
|                             | Yes              | 25 | 17.36   | 8.20               |                 |                 |
| Disease Symptoms            | No               | 19 | 4.11    | 1.10               | -0.606          | 0.548           |
|                             | Yes              | 25 | 4.36    | 1.68               |                 |                 |
| Daily Activities            | No               | 19 | 3.00    | 1.83               | -1.057          | 0.296           |
|                             | Yes              | 25 | 3.60    | 1.89               |                 |                 |
| Leisure Activities          | No               | 19 | 2.95    | 1.78               | -0.163          | 0.871           |
|                             | Yes              | 25 | 3.04    | 1.93               |                 |                 |
| Work and Study              | No               | 19 | 1.63    | 1.16               | 0.414           | 0.681           |
|                             | Yes              | 25 | 1.48    | 1.23               |                 |                 |
| Interpersonal Relationships | No               | 19 | 1.79    | 1.81               | -1.577          | 0.122           |
|                             | Yes              | 25 | 2.68    | 1.89               |                 |                 |
| Treatment                   | No               | 19 | 1.89    | 0.94               | -1.006          | 0.320           |
|                             | Yes              | 25 | 2.20    | 1.04               |                 |                 |

**Table S3.** Statistical analysis of BMI groups and quality of life by *t*-test (N = 44).

| Aspect           | BMI Groups              | N  | Average | Standard Deviation | <i>t</i> -Value | <i>p</i> -Value |
|------------------|-------------------------|----|---------|--------------------|-----------------|-----------------|
| Quality of Live  | Healthy body weight     | 11 | 15.18   | 6.48               | 0.231           | 0.818           |
|                  | Non-healthy body weight | 33 | 16.94   | 8.15               |                 |                 |
| Disease Symptoms | Healthy body weight     | 11 | 4.36    | 1.36               | -0.648          | 0.520           |
|                  | Non-healthy body weight | 33 | 4.21    | 1.49               |                 |                 |
| Daily Activities | Healthy body weight     | 11 | 2.91    | 1.51               | 0.297           | 0.768           |

|                             |                         |    |      |      |        |       |
|-----------------------------|-------------------------|----|------|------|--------|-------|
| Leisure Activities          | Non-healthy body weight | 33 | 3.48 | 1.97 | -0.884 | 0.382 |
|                             | Healthy body weight     | 11 | 2.64 | 1.21 |        |       |
| Work and Study              | Non-healthy body weight | 33 | 3.12 | 2.01 | -0.752 | 0.456 |
|                             | Healthy body weight     | 11 | 1.18 | .98  |        |       |
| Interpersonal Relationships | Non-healthy body weight | 33 | 1.67 | 1.24 | -1.175 | 0.247 |
|                             | Healthy body weight     | 11 | 2.00 | 1.90 |        |       |
| Treatment                   | Non-healthy body weight | 33 | 2.39 | 1.90 | -0.595 | 0.555 |
|                             | Healthy body weight     | 11 | 2.09 | 1.22 |        |       |
|                             | Non-healthy body weight | 33 | 2.06 | .93  |        |       |

**Table S4.** Statistical analysis of regular exercise and quality of life by *t*-test (N = 44).

| Aspect                      | Regular Exercise | N  | Average | Standard Deviation | <i>t</i> -value | <i>p</i> -value |
|-----------------------------|------------------|----|---------|--------------------|-----------------|-----------------|
| Quality of Live             | No               | 20 | 15.85   | 7.18               | -0.504          | 0.617           |
|                             | Yes              | 24 | 17.04   | 8.28               |                 |                 |
| Disease Symptoms            | No               | 20 | 4.15    | 1.57               | -0.414          | 0.681           |
|                             | Yes              | 24 | 4.33    | 1.37               |                 |                 |
| Daily Activities            | No               | 20 | 3.25    | 1.83               | -0.292          | 0.772           |
|                             | Yes              | 24 | 3.42    | 1.93               |                 |                 |
| Leisure Activities          | No               | 20 | 2.95    | 1.73               | -0.162          | 0.872           |
|                             | Yes              | 24 | 3.04    | 1.97               |                 |                 |
| Work and Study              | No               | 20 | 1.25    | 1.12               | -1.526          | 0.134           |
|                             | Yes              | 24 | 1.79    | 1.22               |                 |                 |
| Interpersonal Relationships | No               | 20 | 2.15    | 1.73               | -0.462          | 0.646           |
|                             | Yes              | 24 | 2.42    | 2.04               |                 |                 |
| Treatment                   | No               | 20 | 2.10    | 0.97               | 0.191           | 0.849           |
|                             | Yes              | 24 | 2.04    | 1.04               |                 |                 |

**Table S5.** Statistical analysis of PASI severity and quality of life by *t*-test (N = 44).

| Aspect                      | PASI Severity      | N  | Average | Standard Deviation | <i>t</i> -Value | <i>p</i> -Value |
|-----------------------------|--------------------|----|---------|--------------------|-----------------|-----------------|
| Quality of Live             | Mild               | 10 | 12.90   | 7.68               | -1.711          | 0.094           |
|                             | Moderate to Severe | 34 | 17.56   | 7.54               |                 |                 |
| Disease Symptoms            | Mild               | 10 | 3.60    | 1.71               | -1.646          | 0.107           |
|                             | Moderate to Severe | 34 | 4.44    | 1.33               |                 |                 |
| Daily Activities            | Mild               | 10 | 2.50    | 1.72               | -1.653          | 0.106           |
|                             | Moderate to Severe | 34 | 3.59    | 1.86               |                 |                 |
| Leisure Activities          | Mild               | 10 | 2.00    | 1.56               | -2.021          | 0.050           |
|                             | Moderate to Severe | 34 | 3.29    | 1.83               |                 |                 |
| Work and Study              | Mild               | 10 | 1.40    | 1.17               | -0.435          | 0.665           |
|                             | Moderate to Severe | 34 | 1.59    | 1.21               |                 |                 |
| Interpersonal Relationships | Mild               | 10 | 1.90    | 1.97               | -0.750          | 0.457           |
|                             | Moderate to Severe | 34 | 2.41    | 1.88               |                 |                 |
| Treatment                   | Mild               | 10 | 1.50    | 1.08               | -2.132 *        | 0.039           |
|                             | Moderate to Severe | 34 | 2.24    | 0.92               |                 |                 |

**Table S6.** Statistical analysis of age and quality of life by *t*-test (N = 44).

| Aspect                      | Age                    | N  | Average | Standard Deviation | F-Value | p-Value | Scheffé Post hoc Comparison |
|-----------------------------|------------------------|----|---------|--------------------|---------|---------|-----------------------------|
| Quality of Live             | 40 years old and below | 9  | 17.22   | 8.44               | 0.049   | 0.953   | NA                          |
|                             | 41 to 50 years old     | 20 | 16.25   | 7.60               |         |         |                             |
|                             | 51 years old and above | 15 | 16.40   | 8.02               |         |         |                             |
| Disease Symptoms            | 40 years old and below | 9  | 4.44    | 1.51               | 0.124   | 0.883   | NA                          |
|                             | 41 to 50 years old     | 20 | 4.15    | 1.42               |         |         |                             |
|                             | 51 years old and above | 15 | 4.27    | 1.53               |         |         |                             |
| Daily Activities            | 40 years old and below | 9  | 3.44    | 2.01               | 0.064   | 0.938   | NA                          |
|                             | 41 to 50 years old     | 20 | 3.40    | 1.82               |         |         |                             |
|                             | 51 years old and above | 15 | 3.20    | 1.97               |         |         |                             |
| Leisure Activities          | 40 years old and below | 9  | 3.89    | 1.83               | 1.341   | 0.273   | NA                          |
|                             | 41 to 50 years old     | 20 | 2.75    | 1.68               |         |         |                             |
|                             | 51 years old and above | 15 | 2.80    | 2.01               |         |         |                             |
| Work and Study              | 40 years old and below | 9  | 1.33    | 1.12               | 0.539   | 0.588   | NA                          |
|                             | 41 to 50 years old     | 20 | 1.75    | 1.29               |         |         |                             |
|                             | 51 years old and above | 15 | 1.40    | 1.12               |         |         |                             |
| Interpersonal Relationships | 40 years old and below | 9  | 2.11    | 2.26               | 0.817   | 0.449   | NA                          |
|                             | 41 to 50 years old     | 20 | 2.00    | 1.45               |         |         |                             |
|                             | 51 years old and above | 15 | 2.80    | 2.18               |         |         |                             |
| Treatment                   | 40 years old and below | 9  | 2.00    | 1.12               | 0.322   | 0.726   | NA                          |
|                             | 41 to 50 years old     | 20 | 2.20    | 0.83               |         |         |                             |
|                             | 51 years old and above | 15 | 1.93    | 1.16               |         |         |                             |

comparison; n.s. indicates no significant difference after post hoc comparison.

**Table S7.** Statistical analysis of socioeconomic status and quality of life by *t*-test (N = 44).

| Aspect                      | Socioeconomic Status | N  | Average | Standard Deviation | F-value | p-value | Scheffé Post hoc Comparison |
|-----------------------------|----------------------|----|---------|--------------------|---------|---------|-----------------------------|
| Quality of Live             | (1) Middle-to-high   | 16 | 12.69   | 8.72               | 3.648 * | 0.035   | (2) > (1)                   |
|                             | (2) Middle           | 17 | 19.41   | 6.22               |         |         |                             |
|                             | (3) Middle-to-low    | 11 | 17.55   | 6.53               |         |         |                             |
| Disease Symptoms            | (1) Middle-to-high   | 16 | 3.44    | 1.67               | 4.621 * | 0.015   | (2) > (1)                   |
|                             | (2) Middle           | 17 | 4.71    | .85                |         |         |                             |
|                             | (3) Middle-to-low    | 11 | 4.73    | 1.42               |         |         |                             |
| Daily Activities            | (1) Middle-to-high   | 16 | 2.50    | 1.90               | 2.869   | 0.068   | NA                          |
|                             | (2) Middle           | 17 | 3.94    | 1.75               |         |         |                             |
|                             | (3) Middle-to-low    | 11 | 3.64    | 1.69               |         |         |                             |
| Leisure Activities          | (1) Middle-to-high   | 16 | 2.31    | 1.92               | 2.095   | 0.136   | NA                          |
|                             | (2) Middle           | 17 | 3.59    | 1.70               |         |         |                             |
|                             | (3) Middle-to-low    | 11 | 3.09    | 1.76               |         |         |                             |
| Work and Study              | (1) Middle-to-high   | 16 | 1.38    | 1.20               | 1.667   | 0.201   | NA                          |
|                             | (2) Middle           | 17 | 1.94    | 1.20               |         |         |                             |
|                             | (3) Middle-to-low    | 11 | 1.18    | 1.08               |         |         |                             |
| Interpersonal Relationships | (1) Middle-to-high   | 16 | 1.38    | 1.86               | 3.564 * | 0.037   | (2) > (1)                   |
|                             | (2) Middle           | 17 | 3.00    | 1.62               |         |         |                             |
|                             | (3) Middle-to-low    | 11 | 2.55    | 1.92               |         |         |                             |
| Treatment                   | (1) Middle-to-high   | 16 | 1.69    | 0.95               | 1.971   | 0.152   | NA                          |
|                             | (2) Middle           | 17 | 2.24    | 0.83               |         |         |                             |

| Aspect | Socioeconomic Status | N  | Average | Standard Deviation | F-value | p-value | Scheffé Post hoc Comparison |
|--------|----------------------|----|---------|--------------------|---------|---------|-----------------------------|
|        | (3) Middle-to-low    | 11 | 2.36    | 1.21               |         |         |                             |

NA indicates no need for post hoc comparison; n.s. indicates no significant difference after post hoc comparison.

**Table S8.** Statistical analysis of marital status and quality of life by *t*-test (N = 44).

| Aspect                      | Marital Status | N  | Average | Standard Deviation | F-Value | p-Value | Scheffé Post hoc Comparison |
|-----------------------------|----------------|----|---------|--------------------|---------|---------|-----------------------------|
| Quality of Live             | (1) Single     | 11 | 16.55   | 6.38               | 0.027   | 0.973   | NA                          |
|                             | (2) Married    | 27 | 16.33   | 8.52               |         |         |                             |
|                             | (3) Others     | 6  | 17.17   | 7.41               |         |         |                             |
| Disease Symptoms            | (1) Single     | 11 | 4.45    | 1.37               | 0.179   | 0.837   | NA                          |
|                             | (2) Married    | 27 | 4.15    | 1.56               |         |         |                             |
|                             | (3) Others     | 6  | 4.33    | 1.21               |         |         |                             |
| Daily Activities            | (1) Single     | 11 | 3.18    | 1.47               | 0.062   | 0.940   | NA                          |
|                             | (2) Married    | 27 | 3.37    | 2.06               |         |         |                             |
|                             | (3) Others     | 6  | 3.50    | 1.87               |         |         |                             |
| Leisure Activities          | (1) Single     | 11 | 3.36    | 1.50               | 0.292   | 0.749   | NA                          |
|                             | (2) Married    | 27 | 2.85    | 2.01               |         |         |                             |
|                             | (3) Others     | 6  | 3.00    | 1.79               |         |         |                             |
| Work and Study              | (1) Single     | 11 | 1.45    | 1.13               | 0.188   | 0.830   | NA                          |
|                             | (2) Married    | 27 | 1.63    | 1.21               |         |         |                             |
|                             | (3) Others     | 6  | 1.33    | 1.37               |         |         |                             |
| Interpersonal Relationships | (1) Single     | 11 | 2.00    | 1.48               | 0.546   | 0.583   | NA                          |
|                             | (2) Married    | 27 | 2.26    | 1.97               |         |         |                             |
|                             | (3) Others     | 6  | 3.00    | 2.28               |         |         |                             |
| Treatment                   | (1) Single     | 11 | 2.09    | 1.04               | 0.017   | 0.984   | NA                          |
|                             | (2) Married    | 27 | 2.07    | 0.96               |         |         |                             |
|                             | (3) Others     | 6  | 2.00    | 1.26               |         |         |                             |

NA indicates no need for post hoc comparison; n.s. indicates no significant difference after post hoc comparison.

**Table S9.** Statistical analysis of religion and quality of life by *t*-test (N = 44).

| Aspect             | Religion     | N  | Average | Standard Deviation | F-value | p-value | Scheffé Post hoc Comparison |
|--------------------|--------------|----|---------|--------------------|---------|---------|-----------------------------|
| Quality of Live    | (1) None     | 23 | 15.35   | 7.00               | 2.345   | 0.109   | NA                          |
|                    | (2) Buddhism | 10 | 21.00   | 8.71               |         |         |                             |
|                    | (3) Taoism   | 11 | 14.82   | 7.40               |         |         |                             |
| Disease Symptoms   | (1) None     | 23 | 4.22    | 1.35               | 0.450   | 0.641   | NA                          |
|                    | (2) Buddhism | 10 | 4.60    | 1.35               |         |         |                             |
|                    | (3) Taoism   | 11 | 4.00    | 1.79               |         |         |                             |
| Daily Activities   | (1) None     | 23 | 3.17    | 1.90               | 0.806   | 0.453   | NA                          |
|                    | (2) Buddhism | 10 | 4.00    | 2.00               |         |         |                             |
|                    | (3) Taoism   | 11 | 3.09    | 1.70               |         |         |                             |
| Leisure Activities | (1) None     | 23 | 2.78    | 1.83               | 2.605   | 0.086   | NA                          |
|                    | (2) Buddhism | 10 | 4.10    | 1.85               |         |         |                             |
|                    | (3) Taoism   | 11 | 2.45    | 1.57               |         |         |                             |

| Aspect                      | Religion     | N  | Average | Standard Deviation | F-value  | p-value | Scheffé Post hoc Comparison |
|-----------------------------|--------------|----|---------|--------------------|----------|---------|-----------------------------|
| Work and Study              | (1) None     | 23 | 1.48    | 1.12               | 1.688    | 0.197   | NA                          |
|                             | (2) Buddhism | 10 | 2.10    | 1.20               |          |         |                             |
|                             | (3) Taoism   | 11 | 1.18    | 1.25               |          |         |                             |
| Interpersonal Relationships | (1) None     | 23 | 1.70    | 1.49               | 5.956 ** | 0.005   | (2) > (1)                   |
|                             | (2) Buddhism | 10 | 3.90    | 2.08               |          |         |                             |
|                             | (3) Taoism   | 11 | 2.09    | 1.76               |          |         |                             |
| Treatment                   | (1) None     | 23 | 2.00    | 0.90               | 0.339    | 0.715   | NA                          |
|                             | (2) Buddhism | 10 | 2.30    | 1.25               |          |         |                             |
|                             | (3) Taoism   | 11 | 2.00    | 1.00               |          |         |                             |

NA indicates no need for post hoc comparison; n.s. indicates no significant difference after post hoc comparison.

**Table S10.** Statistical analysis of income and quality of life by t-test (N = 44).

| Aspect                      | Income                | N  | Average | Standard Deviation | F-Value | p-Value | Scheffé Post hoc Comparison |
|-----------------------------|-----------------------|----|---------|--------------------|---------|---------|-----------------------------|
| Quality of Live             | (1) < 19,999 NTD      | 5  | 15.60   | 6.80               | 0.750   | 0.529   | NA                          |
|                             | (2) 20,000–39,999 NTD | 14 | 19.07   | 6.93               |         |         |                             |
|                             | (3) 40,000–59,999 NTD | 12 | 15.42   | 8.11               |         |         |                             |
|                             | (4) > 60,000 NTD      | 13 | 15.08   | 8.67               |         |         |                             |
| Disease Symptoms            | (1) < 19,999 NTD      | 5  | 3.80    | 1.10               | 1.764   | 0.169   | NA                          |
|                             | (2) 20,000–39,999元    | 14 | 4.93    | 1.07               |         |         |                             |
|                             | (3) 40,000–59,999元    | 12 | 4.17    | 1.80               |         |         |                             |
|                             | (4) 60,000元以上         | 13 | 3.77    | 1.42               |         |         |                             |
| Daily Activities            | (1) < 19,999 NTD      | 5  | 3.60    | 1.95               | 0.593   | 0.623   | NA                          |
|                             | (2) 20,000–39,999 NTD | 14 | 3.79    | 1.97               |         |         |                             |
|                             | (3) 40,000–59,999 NTD | 12 | 3.25    | 1.86               |         |         |                             |
|                             | (4) > 60,000 NTD      | 13 | 2.85    | 1.82               |         |         |                             |
| Leisure Activities          | (1) < 19,999 NTD      | 5  | 2.40    | 1.82               | 0.751   | 0.528   | NA                          |
|                             | (2) 20,000–39,999 NTD | 14 | 3.57    | 1.91               |         |         |                             |
|                             | (3) 40,000–59,999 NTD | 12 | 2.67    | 1.87               |         |         |                             |
|                             | (4) > 60,000 NTD      | 13 | 2.92    | 1.80               |         |         |                             |
| Work and Study              | (1) < 19,999 NTD      | 5  | 1.40    | 1.52               | 0.111   | 0.953   | NA                          |
|                             | (2) 20,000–39,999 NTD | 14 | 1.64    | 1.15               |         |         |                             |
|                             | (3) 40,000–59,999 NTD | 12 | 1.42    | 1.16               |         |         |                             |
|                             | (4) > 60,000 NTD      | 13 | 1.62    | 1.26               |         |         |                             |
| Interpersonal Relationships | (1) < 19,999 NTD      | 5  | 2.20    | 2.28               | 0.620   | 0.606   | NA                          |
|                             | (2) 20,000–39,999 NTD | 14 | 2.86    | 1.70               |         |         |                             |
|                             | (3) 40,000–59,999 NTD | 12 | 1.92    | 1.62               |         |         |                             |
|                             | (4) > 60,000 NTD      | 13 | 2.08    | 2.22               |         |         |                             |
| Treatment                   | (1) < 19,999 NTD      | 5  | 2.20    | 1.30               | 0.466   | 0.707   | NA                          |
|                             | (2) 20,000–39,999 NTD | 14 | 2.29    | 1.07               |         |         |                             |
|                             | (3) 40,000–59,999 NTD | 12 | 2.00    | 1.04               |         |         |                             |
|                             | (4) > 60,000 NTD      | 13 | 1.85    | 0.80               |         |         |                             |

NA indicates no need for post hoc comparison; n.s. indicates no significant difference after post hoc comparison.

**Table S11.** Statistical analysis of major locations of psoriasis lesions and quality of life by *t*-test (N = 44).

| Aspect                      | Major Locations of Psoriasis Lesions | N  | Average | Standard Deviation | F-Value | p-Value | Scheffé Post hoc Comparison |
|-----------------------------|--------------------------------------|----|---------|--------------------|---------|---------|-----------------------------|
| Quality of Live             | (1) Scalp                            | 8  | 13.88   | 6.03               | 1.842   | 0.155   | NA                          |
|                             | (2) Face                             | 8  | 12.75   | 9.62               |         |         |                             |
|                             | (3) Trunk                            | 12 | 16.75   | 7.88               |         |         |                             |
|                             | (4) Limbs                            | 16 | 19.50   | 6.71               |         |         |                             |
| Disease Symptoms            | (1) Scalp                            | 8  | 4.00    | 1.20               | 1.323   | 0.280   | NA                          |
|                             | (2) Face                             | 8  | 3.50    | 2.14               |         |         |                             |
|                             | (3) Trunk                            | 12 | 4.33    | 1.07               |         |         |                             |
|                             | (4) Limbs                            | 16 | 4.69    | 1.35               |         |         |                             |
| Daily Activities            | (1) Scalp                            | 8  | 2.75    | 1.75               | 1.681   | 0.186   | NA                          |
|                             | (2) Face                             | 8  | 2.50    | 2.07               |         |         |                             |
|                             | (3) Trunk                            | 12 | 3.33    | 1.97               |         |         |                             |
|                             | (4) Limbs                            | 16 | 4.06    | 1.61               |         |         |                             |
| Leisure Activities          | (1) Scalp                            | 8  | 2.38    | 2.13               | 1.593   | 0.206   | NA                          |
|                             | (2) Face                             | 8  | 2.38    | 2.07               |         |         |                             |
|                             | (3) Trunk                            | 12 | 2.83    | 2.04               |         |         |                             |
|                             | (4) Limbs                            | 16 | 3.75    | 1.24               |         |         |                             |
| Work and Study              | (1) Scalp                            | 8  | 0.88    | 0.99               | 3.262 * | 0.031   | n.s                         |
|                             | (2) Face                             | 8  | 0.88    | 0.99               |         |         |                             |
|                             | (3) Trunk                            | 12 | 1.75    | 1.22               |         |         |                             |
|                             | (4) Limbs                            | 16 | 2.06    | 1.12               |         |         |                             |
| Interpersonal Relationships | (1) Scalp                            | 8  | 2.00    | 2.00               | 0.124   | 0.946   | NA                          |
|                             | (2) Face                             | 8  | 2.25    | 2.43               |         |         |                             |
|                             | (3) Trunk                            | 12 | 2.25    | 1.96               |         |         |                             |
|                             | (4) Limbs                            | 16 | 2.50    | 1.63               |         |         |                             |
| Treatment                   | (1) Scalp                            | 8  | 1.88    | 0.83               | 3.176 * | 0.034   | (4) > (2)                   |
|                             | (2) Face                             | 8  | 1.25    | 1.28               |         |         |                             |
|                             | (3) Trunk                            | 12 | 2.25    | 0.87               |         |         |                             |
|                             | (4) Limbs                            | 16 | 2.44    | 0.81               |         |         |                             |

NA indicates no need for post hoc comparison; n.s. indicates no significant difference after post hoc comparison.

**Table S12.** Statistical analysis of smoking and quality of life by *t*-test (N = 44).

| Aspect             | Smoking            | N  | Average | Standard Deviation | F-value | p-Value | Scheffé Post hoc Comparison |
|--------------------|--------------------|----|---------|--------------------|---------|---------|-----------------------------|
| Quality of Live    | (1) Non-smoker     | 25 | 15.36   | 7.78               | 0.660   | 0.522   | NA                          |
|                    | (2) Current smoker | 15 | 17.73   | 7.91               |         |         |                             |
|                    | (3) Former smoker  | 4  | 19.00   | 7.39               |         |         |                             |
| Disease Symptoms   | (1) Non-smoker     | 25 | 4.16    | 1.60               | 0.266   | 0.768   | NA                          |
|                    | (2) Current smoker | 15 | 4.47    | 1.25               |         |         |                             |
|                    | (3) Former smoker  | 4  | 4.00    | 1.41               |         |         |                             |
| Daily Activities   | (1) Non-smoker     | 25 | 2.96    | 1.81               | 1.347   | 0.271   | NA                          |
|                    | (2) Current smoker | 15 | 3.73    | 1.83               |         |         |                             |
|                    | (3) Former smoker  | 4  | 4.25    | 2.22               |         |         |                             |
| Leisure Activities | (1) Non-smoker     | 25 | 2.60    | 1.78               | 1.572   | 0.220   | NA                          |
|                    | (2) Current smoker | 15 | 3.40    | 1.96               |         |         |                             |
|                    | (3) Former smoker  | 4  | 4.00    | 1.41               |         |         |                             |

| Aspect                      | Smoking            | N  | Average | Standard Deviation | F-value | p-Value | Scheffé Post hoc Comparison |
|-----------------------------|--------------------|----|---------|--------------------|---------|---------|-----------------------------|
| Work and Study              | (1) Non-smoker     | 25 | 1.52    | 1.16               | 0.320   | 0.728   | NA                          |
|                             | (2) Current smoker | 15 | 1.47    | 1.25               |         |         |                             |
|                             | (3) Former smoker  | 4  | 2.00    | 1.41               |         |         |                             |
| Interpersonal Relationships | (1) Non-smoker     | 25 | 2.24    | 1.81               | 0.033   | 0.967   | NA                          |
|                             | (2) Current smoker | 15 | 2.40    | 2.13               |         |         |                             |
|                             | (3) Former smoker  | 4  | 2.25    | 1.89               |         |         |                             |
| Treatment                   | (1) Non-smoker     | 25 | 1.88    | 1.09               | 1.123   | 0.335   | NA                          |
|                             | (2) Current smoker | 15 | 2.27    | .80                |         |         |                             |
|                             | (3) Former smoker  | 4  | 2.50    | 1.00               |         |         |                             |

NA indicates no need for post hoc comparison; n.s. indicates no significant difference after post hoc comparison.

**Table S13.** Statistical analysis of alcohol consumption and quality of life by *t*-test (N = 44).

| Aspect                      | Alcohol Consumption | N  | Average | Standard Deviation | F-Value | p-Value | Scheffé Post hoc comparison |
|-----------------------------|---------------------|----|---------|--------------------|---------|---------|-----------------------------|
| Quality of Live             | (1) No              | 30 | 16.07   | 7.66               | 0.152   | 0.859   | NA                          |
|                             | (2) Yes             | 11 | 17.27   | 7.52               |         |         |                             |
|                             | (3) Quitted         | 3  | 18.00   | 12.00              |         |         |                             |
| Disease Symptoms            | (1) No              | 30 | 4.20    | 1.54               | 0.054   | 0.947   | NA                          |
|                             | (2) Yes             | 11 | 4.36    | 1.29               |         |         |                             |
|                             | (3) Quitted         | 3  | 4.33    | 1.53               |         |         |                             |
| Daily Activities            | (1) No              | 30 | 3.27    | 1.89               | 0.204   | 0.817   | NA                          |
|                             | (2) Yes             | 11 | 3.36    | 1.75               |         |         |                             |
|                             | (3) Quitted         | 3  | 4.00    | 2.65               |         |         |                             |
| Leisure Activities          | (1) No              | 30 | 2.87    | 1.85               | .239    | 0.788   | NA                          |
|                             | (2) Yes             | 11 | 3.27    | 1.62               |         |         |                             |
|                             | (3) Quitted         | 3  | 3.33    | 3.06               |         |         |                             |
| Work and Study              | (1) No              | 30 | 1.70    | 1.15               | 0.851   | 0.434   | NA                          |
|                             | (2) Yes             | 11 | 1.27    | 1.19               |         |         |                             |
|                             | (3) Quitted         | 3  | 1.00    | 1.73               |         |         |                             |
| Interpersonal Relationships | (1) No              | 30 | 2.07    | 1.68               | 0.690   | 0.507   | NA                          |
|                             | (2) Yes             | 11 | 2.82    | 2.18               |         |         |                             |
|                             | (3) Quitted         | 3  | 2.67    | 3.06               |         |         |                             |
| Treatment                   | (1) No              | 30 | 1.97    | 1.07               | 0.758   | 0.475   | NA                          |
|                             | (2) Yes             | 11 | 2.18    | 0.87               |         |         |                             |
|                             | (3) Quitted         | 3  | 2.67    | 0.58               |         |         |                             |

NA indicates no need for post hoc comparison; n.s. indicates no significant difference after post hoc comparison.
